# Supplementary material for: ORC-Q
Source: Atypon-hosted journal article supplement (doi:10.1026/0012-1924/a000324), 2023-09-18
Supplement: 0012-1924_a000324_esm2.pdf [file 0012-1924_a000324_esm2.pdf]

## ESM 2. Types of Organizational Change and their Respective Distributions in Both Samples

**Table 1.** Types of organizational change and their respective distribution in the first sample ( $N = 224$ )

| Category                              | <i>n</i> | %     |
|---------------------------------------|----------|-------|
| Strategy Deployment                   | 14       | 6.20  |
| Restructuring and Downsizing          | 59       | 26.30 |
| Technology Change                     | 35       | 15.60 |
| Mixed Collection of Change Efforts    | 13       | 5.80  |
| TQM-driven Change (TQM)               | 8        | 3.60  |
| Mergers and Acquisitions              | 19       | 8.50  |
| Re-engineering and Process Design     | 18       | 8.00  |
| Software Development and Installation | 3        | 1.30  |
| Business Expansion                    | 4        | 1.80  |
| Culture change                        | 8        | 3.60  |
| Other type of change (unspecified)    | 43       | 19.20 |

*Note:* Types are adapted from M. E. Smith (2002, p. 27).

**Table 2.** Types of organizational change and their respective distribution in the second sample ( $N = 384$ )

| Category                              | <i>n</i> | %     |
|---------------------------------------|----------|-------|
| Strategy Deployment                   | 28       | 7.30  |
| Restructuring and Downsizing          | 107      | 27.90 |
| Technology Change                     | 48       | 12.50 |
| Mixed Collection of Change Efforts    | 30       | 7.80  |
| TQM-driven Change (TQM)               | 13       | 3.40  |
| Mergers and Acquisitions              | 24       | 6.20  |
| Re-engineering and Process Design     | 20       | 5.20  |
| Software Development and Installation | 12       | 3.10  |
| Business Expansion                    | 11       | 2.90  |
| Culture change                        | 5        | 1.30  |
| Other type of change (unspecified)    | 86       | 22.40 |

*Note:* Types are adapted from M. E. Smith (2002, p. 27).

## Literature

Smith, M. E. (2002). Success Rates for Different Types of Organizational Change. *Performance Improvement*, 41(1), 26–33. <https://doi.org/10.1002/pfi.4140410107>
