# Supplementary material for: ORC-Q
Source: Atypon-hosted journal article supplement (doi:10.1026/0012-1924/a000324), 2023-09-18
Supplement: 0012-1924_a000324_esm3.pdf [file 0012-1924_a000324_esm3.pdf]

### ESM 3. Results of Exploratory Factor Analysis

| Items                                                                                                    | Factor Loadings |            |            |            |   |
|----------------------------------------------------------------------------------------------------------|-----------------|------------|------------|------------|---|
|                                                                                                          | 1               | 2          | 3          | 4          | 5 |
| Factor 1: Organizational Valence                                                                         |                 |            |            |            |   |
| <b>disk1. Die Veränderung ist wichtig für unsere Organisation.</b>                                       | <b>.84</b>      |            |            |            |   |
| disk2. Die Veränderung ist notwendig für unsere Organisation.                                            | .83             |            |            |            |   |
| <b>ang3. Es gibt für unsere Organisation gute Gründe, die Veränderung einzuführen.</b>                   | <b>.79</b>      |            |            |            |   |
| ang4. Die Veränderung umzusetzen stellt eine gute Strategie für unsere Organisation dar.                 | .67             |            |            |            |   |
| ang5. Insgesamt ist die Veränderung für unsere Organisation positiv.                                     | .62             |            |            |            |   |
| <b>ang2. Unsere Organisation wird von der Veränderung profitieren.</b>                                   | <b>.61</b>      |            |            |            |   |
| ang1. Die Veränderung wird unsere Organisationsleistung verbessern.                                      | .57             |            |            |            |   |
| Factor 2: Individual Valence                                                                             |                 |            |            |            |   |
| <b>iv1. Ich werde durch die Veränderung mehr Möglichkeiten haben, mich beruflich weiterzuentwickeln.</b> |                 | <b>.70</b> |            |            |   |
| <b>iv2. Ich werde an der Veränderung persönlich wachsen.</b>                                             |                 | <b>.67</b> |            |            |   |
| <b>iv4. Ich werde durch die Veränderung Vorteile haben.</b>                                              |                 | <b>.61</b> |            |            |   |
| Factor 3: Positive Affect                                                                                |                 |            |            |            |   |
| <b>aph1. Die Veränderung stimmt mich enthusiastisch.</b>                                                 |                 |            | <b>.79</b> |            |   |
| <b>apl4. Insgesamt freue ich mich über die Veränderung.</b>                                              |                 |            | <b>.73</b> |            |   |
| apl2. Ich bin mit der Veränderung zufrieden.                                                             |                 |            | .66        |            |   |
| <b>aph2. Ich fühle mich durch die Veränderung motiviert.</b>                                             |                 |            | <b>.51</b> |            |   |
| Factor 4: Negative Affect                                                                                |                 |            |            |            |   |
| anl2. Die Veränderung macht mich nervös.                                                                 |                 |            | .86        |            |   |
| <b>anh2. Ich fühle mich durch die Veränderung gestresst.</b>                                             |                 |            | <b>.82</b> |            |   |
| anl3. Die Veränderung macht mich traurig.                                                                |                 |            | .78        |            |   |
| <b>anl4. Insgesamt habe ich bei der Veränderung ein ungutes Gefühl.</b>                                  |                 |            | <b>.77</b> |            |   |
| <b>anl1. Ich fühle mich der Veränderung ausgeliefert.</b>                                                |                 |            | <b>.77</b> |            |   |
| anh1. Mich ärgert die Veränderung.                                                                       |                 |            | .72        |            |   |
| Factor 5: Change Behavior                                                                                |                 |            |            |            |   |
| <b>vp2. Ich informiere mich aktiv über die Veränderung.</b>                                              |                 |            |            | <b>.78</b> |   |
| va1. Ich verfolge die erhaltenen Informationen zur Veränderung aufmerksam.                               |                 |            |            | .72        |   |
| va2. Ich nutze angebotene Möglichkeiten, um mich über die Veränderung zu informieren.                    |                 |            |            | .69        |   |
| <b>vp1. Ich tausche mich aktiv mit meinen Kolleginnen und Kollegen über die Veränderung aus.</b>         |                 |            |            | <b>.68</b> |   |
| <b>vw5. Wenn mir etwas an der Veränderung nicht passt, sage ich das.</b>                                 |                 |            |            | <b>.59</b> |   |

Note:  $N = 224$ . Results based on Maximum-Likelihood Factor Analysis using Direct Oblimin Rotation. Items marked as bold were selected for the respective scale. Only Items with factor loadings  $> .50$  are displayed.
