# Supplementary material for: ORC-Q
Source: Atypon-hosted journal article supplement (doi:10.1026/0012-1924/a000324), 2023-09-18
Supplement: 0012-1924_a000324_esm4.pdf [file 0012-1924_a000324_esm4.pdf]

#### ESM 4. English Translation of the 15-Items ORC-Q Version

| German Items (Original)                                                                           | English Items (Translation)                                                       |
|---------------------------------------------------------------------------------------------------|-----------------------------------------------------------------------------------|
| ov1. Die Veränderung ist wichtig für unsere Organisation.                                         | ov1. This change is important for our organization.                               |
| ov2. Es gibt für unsere Organisation gute Gründe, die Veränderung einzuführen.                    | ov2. There are good reasons for our organization to implement this change.        |
| ov3. Unsere Organisation wird von der Veränderung profitieren.                                    | ov3. Our organization will benefit from this change.                              |
| iv4. Ich werde durch die Veränderung mehr Möglichkeiten haben, mich beruflich weiterzuentwickeln. | iv4. This change will give me more opportunities for my professional development. |
| iv5. Ich werde an der Veränderung persönlich wachsen.                                             | iv5. I will grow personally due to this change.                                   |
| iv6. Ich werde durch die Veränderung Vorteile haben.                                              | iv6. I will gain advantages by this change.                                       |
| pa7. Die Veränderung stimmt mich enthusiastisch                                                   | pa7. This change makes me feel enthusiastic.                                      |
| pa8. Insgesamt freue ich mich über die Veränderung                                                | pa8. Overall, I am happy about this change.                                       |
| pa9. Ich fühle mich durch die Veränderung motiviert.                                              | pa9. I feel motivated by this change.                                             |
| na10. Ich fühle mich durch die Veränderung gestresst.                                             | na10. I feel stressed by this change.                                             |
| na11. Insgesamt habe ich bei der Veränderung ein ungutes Gefühl.                                  | na11. Overall, I have a bad feeling about this change.                            |
| na12. Ich fühle mich der Veränderung ausgeliefert.                                                | na12. I feel at the mercy of this change.                                         |
| cb13. Ich informiere mich aktiv über die Veränderung.                                             | cb13. I actively inform myself about this change.                                 |
| cb14. Ich tausche mich aktiv mit meinen Kolleginnen und Kollegen über die Veränderung aus.        | cb14. I actively exchange information about this change with my colleagues.       |
| cb15. Wenn mir etwas an der Veränderung nicht passt, sage ich das.                                | cb15. If I don't like something about this change, I say so.                      |

*Note:* This translated version is not psychometrically tested and thus, not intended for use.
