# Supplementary material for: ORC-Q
Source: Atypon-hosted journal article supplement (doi:10.1026/0012-1924/a000324), 2023-09-18
Supplement: 0012-1924_a000324_esm5.pdf [file 0012-1924_a000324_esm5.pdf]

**ESM 5.** Model of Organizational Readiness for Change based on Confirmatory Factor Analysis

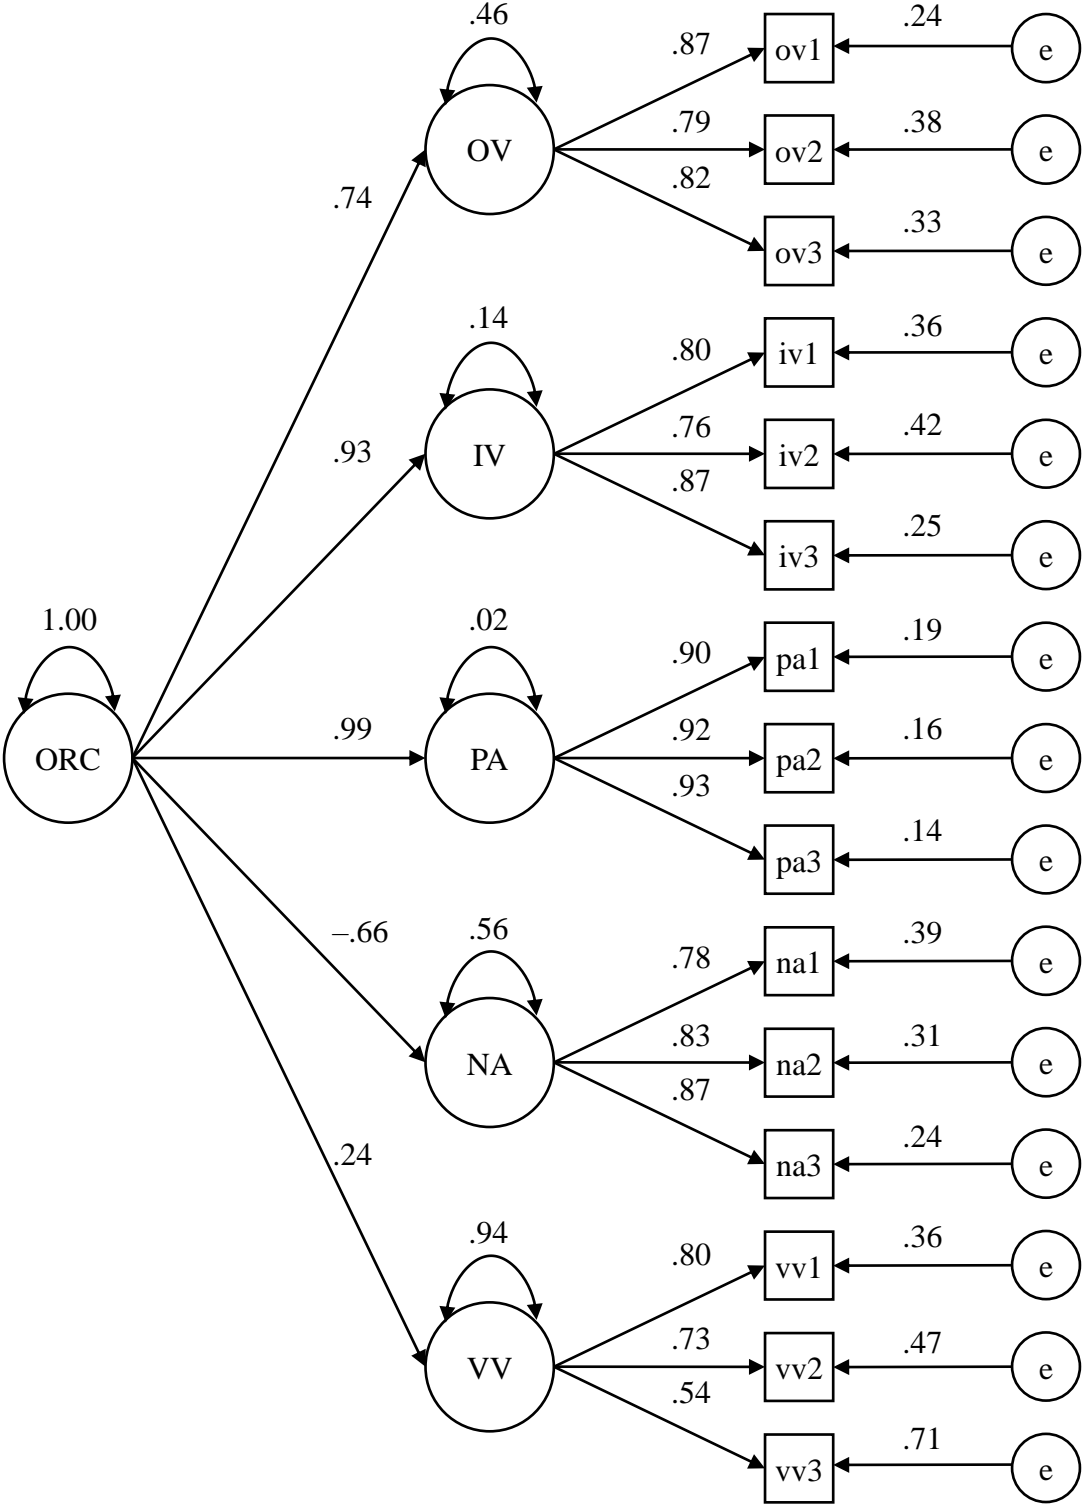

*Note:*  $N = 384$ . Standardized factor loadings, factor variances and error terms. Circles indicate latent constructs, Squares indicate manifest indicators of the respective construct. Visualization is based on model 5. ORC = Organizational Readiness for Change; OV = Organizational Valence; IV = Individual Valence; PA = Positive Affect; NA = Negative Affect; VV = Change Behavior. e = Error term.
