# Supplementary figures and images for: ORC-Q
Source: Atypon-hosted journal article supplement (doi:10.1026/0012-1924/a000324), 2023-09-18

# ESM 1. Holistic Overview on the Construction Approach

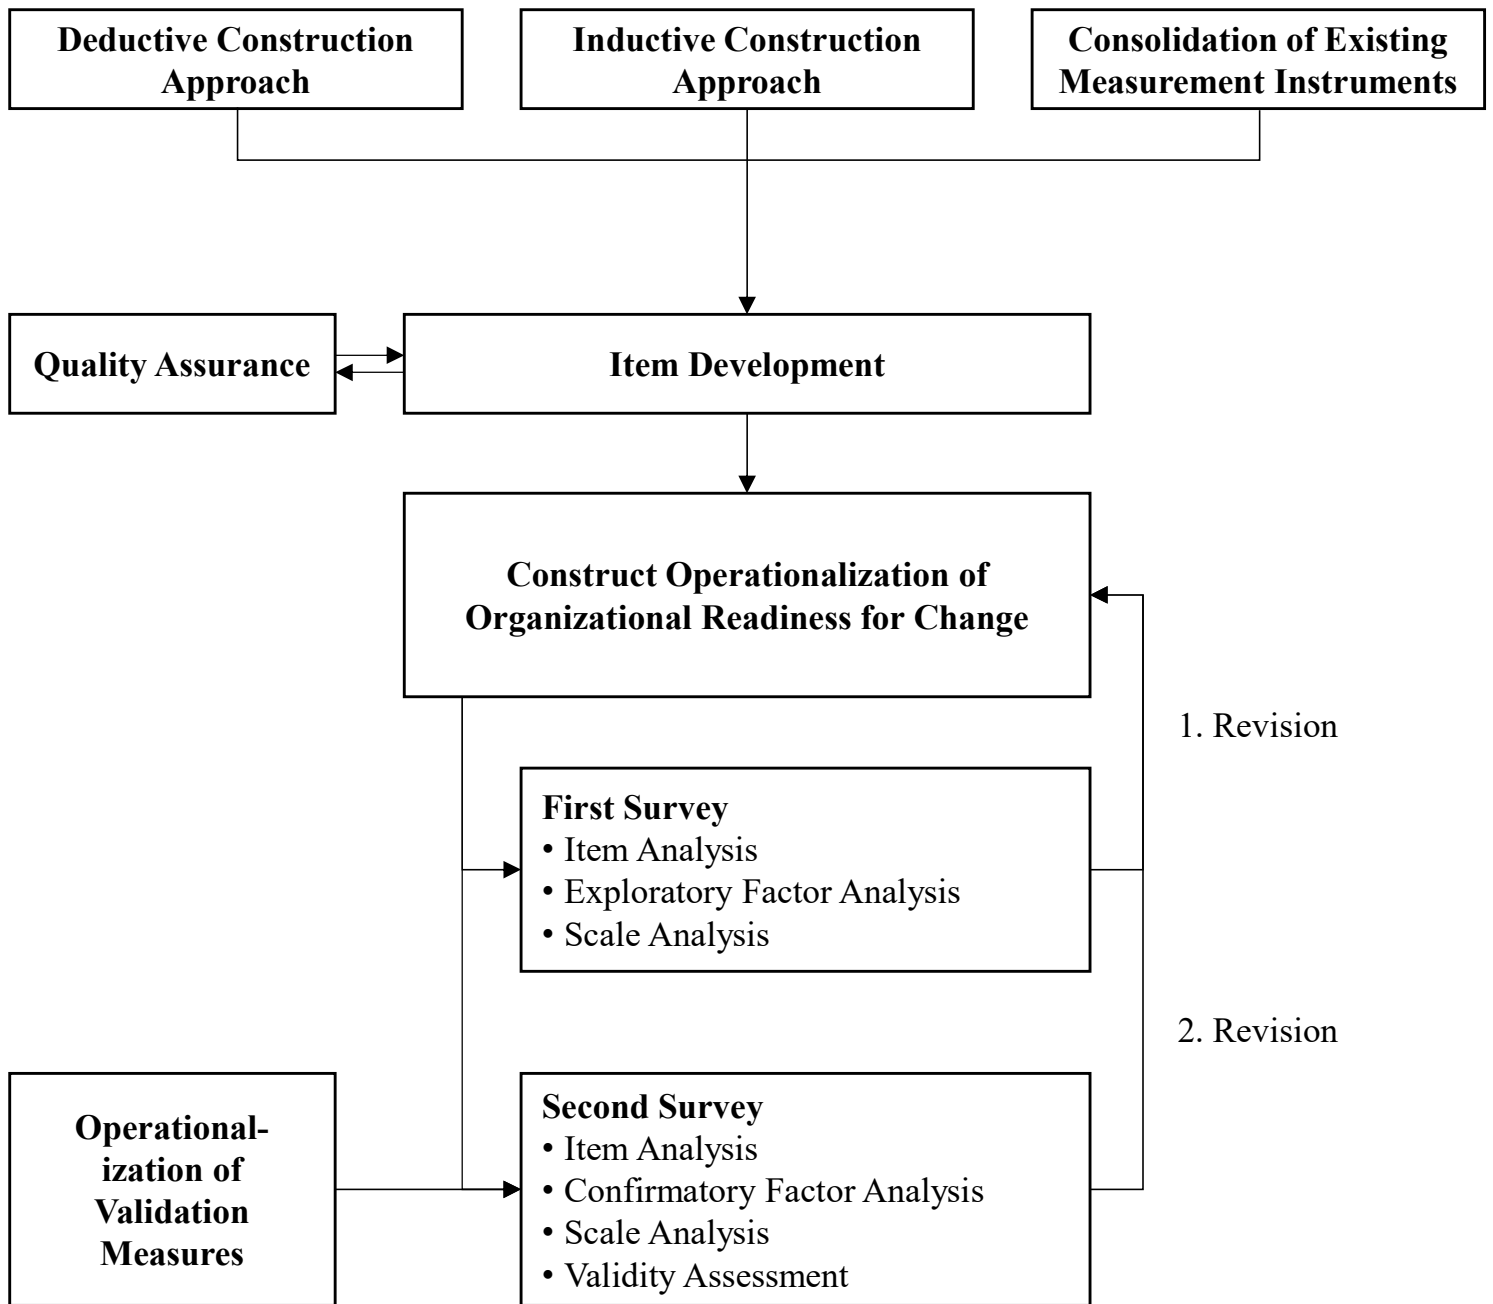

Supplement: 0012-1924_a000324_esm1.pdf [file 0012-1924_a000324_esm1.pdf]
